# Supplementary material
Source: PubMed Central journal article supplement (PMC4542176)
Supplement: JB.00098-15_zjb999093728so1.pdf [file JB.00098-15_zjb999093728so1.pdf]

**Supplemental Material**

Theresa D. Ho & Craig D. Ellermeier

Department of Microbiology  
University of Iowa  
51 Newton Rd  
Iowa City, IA 52242

Running title: Fur repression in *C. difficile*

Keywords: iron acquisition, gene expression, *Clostridium difficile*

**Table S1. List of Oligonucleotide Primers.**

| Primer Name | Use                                                   | Sequence 5'-3'                                                                   |
|-------------|-------------------------------------------------------|----------------------------------------------------------------------------------|
| RP34        | qRT PCR in <i>mldA</i>                                | acagaaccacttattggcaaattg                                                         |
| RP35        | qRT PCR in <i>mldA</i>                                | gagagtctaattccctcttcatagcc                                                       |
| CDEP3202    | 5' <i>fur</i> for <i>in vitro</i> protein synthesis   | gccaataatacgcactcactatagggcctaagtataaggaggaaaaaatatg<br>gcaaatacaatggattattaaaag |
| CDEP3203    | 3' <i>fur</i> for <i>in vitro</i> protein synthesis   | aaaccctccgfttagagaggggtatgctagtattattcttctgaatcgcttact<br>cc                     |
| CDEP3221    | 5' <i>fur</i> for <i>in vitro</i> protein synthesis   | gccaataatacgcactcactatagggcctaagtataaggagg                                       |
| TE485       | Test DNA contamination of RNA                         | aaggtagcttaagtctattctagg                                                         |
| TE486       | Test DNA contamination of RNA                         | aaggtagcttaagtctattctagg                                                         |
| TE2125      | <i>fur</i> targetron IBS1                             | aaaaaagcttataattatccttagattacgcacagtgtgcccagatagggtg                             |
| TE2126      | <i>fur</i> targetron EBS1d                            | cagattgtacaaatgtgggataacagataagtcgcacagtcttaacttaccttct<br>ttgt                  |
| TE2127      | <i>fur</i> targetron EBS2                             | tgaacgcaagtttctaatttcgatttaattctcgatagaggaaagtgtct                               |
| TE2247      | 5' P <sub>cd2992</sub> for EMSA                       | atataaatagattattagtaagatgtatgcat                                                 |
| TE2248      | 3' P <sub>cd2992</sub> for EMSA                       | ctattttatcaatttttcaaataccatctagagctttaataagggtgaaactttct                         |
| TE2280      | 3' end of <i>fur</i>                                  | tagggatccttattcttctgaatcgcttac                                                   |
| TE2281      | 5' P <sub>fur</sub> for EMSA                          | taggtagcccttattaattgtaaagcatttatagtatatctg                                       |
| TE2596      | pRPF185 + P <sub>fur<sub>C. difficile</sub></sub> ITA | gaattctgcatcaagctagcccttattaattgtaaagcatttatagtatatctg                           |
| TE2597      | pRPF185 + <i>fur<sub>C. difficile</sub></i> ITA       | ctccttactgcaggagctcttattcttctgaatcgcttactccattaca                                |
| TE2721      | 5' end of <i>fur</i>                                  | tgaccattcacatctaagtagtaaaagaaatctatgatttagtaggg                                  |
| TE2723      | 5' P <sub>cd1477</sub> for EMSA                       | cgattttattaataaaaataaatcaaatgag                                                  |
| TEQ005      | qRT PCR in <i>csfU</i>                                | cggagggtgataatagtgaatgatgctcgg                                                   |
| TEQ006      | qRT PCR in <i>csfU</i>                                | acatggcgataacaataacaatagatgc                                                     |
| TEQ009      | qRT PCR in <i>rpoB</i>                                | aagagctggattcgaagtgcgtga                                                         |
| TEQ010      | qRT PCR in <i>rpoB</i>                                | accgatatttggtccctctggagt                                                         |
| TEQ057      | qRT PCR in <i>feoB2</i>                               | cattggctggcaatccaaatac                                                           |
| TEQ058      | qRT PCR in <i>feoB2</i>                               | ccagtttccagtatgctgtctaa                                                          |
| TEQ059      | qRT PCR in <i>feoA3</i>                               | gattgcttgcacttggatgataa                                                          |
| TEQ060      | qRT PCR in <i>feoA3</i>                               | gcaagggtcaaagcctctaaatc                                                          |
| TEQ061      | qRT PCR in <i>feoB1</i>                               | gftataggttggccagtggtag                                                           |
| TEQ062      | qRT PCR in <i>feoB1</i>                               | cttgaagttcaactgcctt                                                              |
| TEQ065      | qRT PCR in <i>fhuD</i>                                | agttggctacagaagtatgatgaa                                                         |
| TEQ066      | qRT PCR in <i>fhuD</i>                                | aacttgccaacactgtaaataag                                                          |
| TEQ077      | qRT PCR in <i>cd2992</i>                              | gtaacctgtccatgtacacaattaag                                                       |
| TEQ078      | qRT PCR in <i>cd2992</i>                              | cacctctgttcagcaaactc                                                             |
| TEQ079      | qRT PCR in <i>cd1889</i>                              | ttctggaggatgaagcaaagg                                                            |
| TEQ080      | qRT PCR in <i>cd1889</i>                              | cctgctgttgctcatctaata                                                            |
| TEQ081      | qRT PCR in <i>cd1647</i>                              | gctgggttaggaatgagcatag                                                           |
| TEQ082      | qRT PCR in <i>cd1647</i>                              | gctgcatctatttagcacct                                                             |
| TEQ083      | qRT PCR in <i>cd1087</i>                              | accagtttattatgccacagga                                                           |
| TEQ084      | qRT PCR in <i>cd1087</i>                              | gctcctaaaggctcagacatac                                                           |
| TEQ085      | qRT PCR in <i>cd0591</i>                              | ggtctctctccctgtaaataaa                                                           |
| TEQ086      | qRT PCR in <i>cd0591</i>                              | acataactgaaccagccgtatt                                                           |
| TEQ087      | qRT PCR in <i>fldX</i>                                | gtggctgaagggtggaagta                                                             |

|        |                                                               |                                 |
|--------|---------------------------------------------------------------|---------------------------------|
| TEQ088 | qRT PCR in <i>fldX</i>                                        | tagttgctctgctcccataga           |
| TEQ089 | qRT PCR in <i>cd1485</i>                                      | cctctaaagatgtgattggattatgg      |
| TEQ090 | qRT PCR in <i>cd1485</i>                                      | cgaatatgtgtcctcggattgt          |
| TEQ091 | qRT PCR in <i>cd2499</i>                                      | gattgggtgcatgaaagaatgg          |
| TEQ092 | qRT PCR in <i>cd2499</i>                                      | caactgcatctggtcttct             |
| TEQ093 | qRT PCR in <i>cd3118</i>                                      | aaccatggaagatgctgaaac           |
| TEQ094 | qRT PCR in <i>cd3118</i>                                      | tccttcgtaactgccttct             |
| TEQ097 | qRT PCR in <i>cd1745A</i>                                     | tgaagagacttctagccttagga         |
| TEQ098 | qRT PCR in <i>cd1745A</i>                                     | actatagggtcattaagaggagcta       |
| TEQ099 | qRT PCR in <i>fur</i>                                         | cgccacaaagaagagcaatag           |
| TEQ100 | qRT PCR in <i>fur</i>                                         | ttcaggacagtcaaccctaac           |
| TEQ105 | qRT PCR in <i>cd0627A</i>                                     | agcatgtccaagaagtgtatc           |
| TEQ106 | qRT PCR in <i>cd0627A</i>                                     | caaatcccacatccaacacataaa        |
| TEQ107 | qRT PCR in <i>cd2214</i>                                      | aggcaggttacatccaacata           |
| TEQ108 | qRT PCR in <i>cd2214</i>                                      | agtggatgtctaaagcagtagc          |
| TEQ121 | qRT PCR in <i>tcdA</i>                                        | ggagaagtcagtgatattgctctg        |
| TEQ122 | qRT PCR in <i>tcdA</i>                                        | cagtggtagaagattcaactatagcc      |
| TEQ123 | qRT PCR in <i>tcdB</i>                                        | aaggaatatctagttacagaagtattagagc |
| TEQ124 | qRT PCR in <i>tcdB</i>                                        | gcagtgctatttattgacctcca         |
| TEQ129 | qRT PCR in <i>cd1477</i>                                      | aggagggatattatgatgccatt         |
| TEQ130 | qRT PCR in <i>cd1477</i> , 3'<br>P <sub>cd1477</sub> for EMSA | aaagtcctcgtcttatcactcc          |

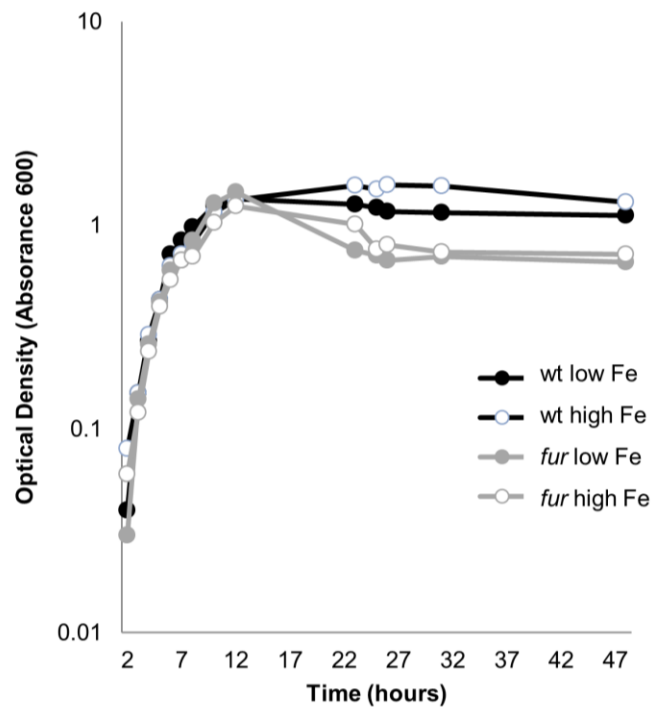

**Figure S1. A *fur* mutant does not exhibit a growth defect.** Wild type and *fur* mutant *C. difficile* strains were grown overnight in high iron containing TY. Overnight cultures were washed in PBS and diluted 1:50 in low (DP, closed circle) or high (Fe, open circle) iron containing TY medium. Optical densities (OD<sub>600</sub>) of the wild type (black line) and *fur* mutant (gray line) cultures were measured over time.
